# Supplementary material for: Comparison of Three Different Random Forest Approaches to Retrieve Daily High-Resolution Snow Cover Maps from MODIS and Sentinel-2 in a Mountain Area, Gran Paradiso National Park (NW Alps)
Source: MDPI journal article supplement (doi:10.3390/rs15020343), 2023-01-06
Supplement: s1 [file s1]

Archive with 1 entries (1 files):
- remotesensing-2040145-supplementary.pdf
